# Supplementary material for: HPV Vaccination in Immunosuppressed Patients with Established Skin Warts and Non-Melanoma Skin Cancer: A Single-Institutional Cohort Study
Source: MDPI journal article supplement (doi:10.3390/vaccines11091490), 2023-09-15
Supplement: s1 [file s1]

**Supplementary Table S1.** Immunosuppressive treatments in patients.

| <b>Immunosuppression</b> | <b>n</b> | <b>Frequency</b> |
|--------------------------|----------|------------------|
| CNI                      | 16       | 42%              |
| Antimetabolite           | 18       | 47%              |
| mTor Inh.                | 6        | 16%              |
| PDN                      | 17       | 45%              |
| Other                    | 9        | 24%              |

CNI: Calcineurin Inhibitor. mTor Inh.: mTor Inhibitor. PDN: Prednisolon.

**Supplementary Table S2.** Number of overall interventions in the study population. Patients may have experienced multiple interventions at one study visit.

| <b>Type</b> | <b>N</b> | <b>Overall</b> | <b>Frq</b> | <b>Intervention</b> |
|-------------|----------|----------------|------------|---------------------|
| Biopsie     | 69       | 2317           | 3%         | major               |
| Curettage   | 538      | 2317           | 23.2%      | major               |
| Excision    | 79       | 2317           | 3.4%       | major               |
| Kryo        | 578      | 2317           | 24.9%      | minor               |
| Topic       | 882      | 2317           | 38.1%      | minor               |
| <b>None</b> | 171      | 2317           | 7.4%       | none                |
